# Supplementary material for: Diurnal variation in the human skin microbiome affects accuracy of forensic microbiome matching
Source: Springer Nature journal article supplement (doi:10.1186/s40168-021-01082-1), 2021-06-05
Supplement: MOESM4 [file 40168_2021_1082_MOESM4_ESM.pdf]

|  |                      |                  | Number of samples (by location) |             |             |             |
|--|----------------------|------------------|---------------------------------|-------------|-------------|-------------|
|  |                      |                  | Residence 1                     | Residence 2 | Residence 3 | Residence 4 |
|  | Site                 | Surface material |                                 |             |             |             |
|  | Left palm            | Skin             | 17                              | 18          | 19          | 15          |
|  | Right palm           | Skin             | 16                              | 16          | 20          | 13          |
|  | Bed headboard        | Mixed            | 18                              | 17          | 20          | 12          |
|  | Door knob            | Mixed            | 17                              | 16          | 20          | 11          |
|  | Park/campus handrail | Metal            | 17                              | 16          | 19          | 16          |
|  | Subway exit handrail | Metal            | 16                              | 16          | 20          | 13          |

Table S1: summary of all samples collected for this study.
